# Supplementary material
Source: Springer Nature journal article supplement (https://www.springermedizin.de/resource/supplementary/12903_2014_476_MOESM1_ESM.pdf/9516798)
Supplement: MOESM1 [file 9516798]

247 patients,  
0–13 years of age,  
in 2004

Serious medically  
compromising  
conditions (n = 42)

Orthodontic  
extractions or  
surgical operations  
only (n = 6)

Baseline data:  
199 patients

No visit after DGA  
(n = 6)

No visit after  
postoperative  
review visit (n = 5)

Patients in follow-up  
(n = 188)  
2004–2009
